# Supplementary material
Source: ML conference proceedings conference paper supplement (https://openreview.net/forum?id=S2zMhPUi5xq)

dimension = 5, edges = 3560 (out of 59340)

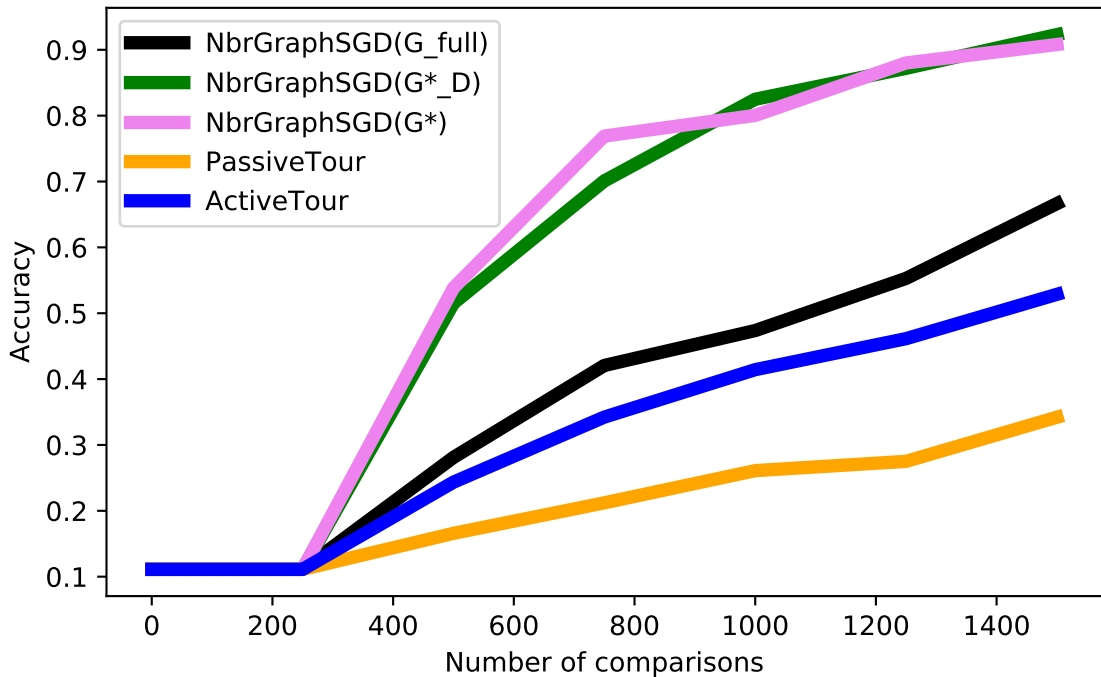

Supplement: supplementary_material [file attachment]

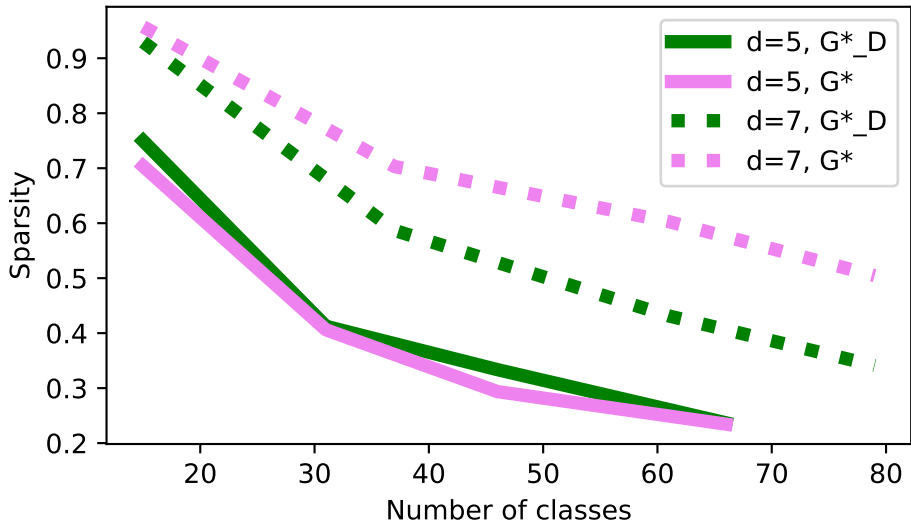

Supplement: supplementary_material [file attachment]
